# Supplementary material
Source: PubMed Central journal article supplement (PMC3293748)
Supplement: supp_blood-2011-01-330704_Document1.pdf [file supp_blood-2011-01-330704_Document1.pdf]

## **Additional results**

We also performed *t*-tests to compare the differences in the 2 miRNA levels according to OS or PFS. Using the median OS to divide the patients, the *P* values of let-7a and miR-16 levels were 0.043 and 0.031, respectively. Using the median PFS to divide the patients, the *P* values of let-7a and miR-16 levels were 0.043 and 0.052, respectively.

Table S1. Patients with high level of each individual microRNAs or both show no significant difference in survival.

|                       | Let-7a high and miR-16 high | Let-7a high and miR-16 low (n=4) or miR-16 high and let-7a low (n=3) | <i>P</i> |
|-----------------------|-----------------------------|----------------------------------------------------------------------|----------|
| Number of patients, n | 8                           | 7                                                                    |          |
| Median OS, month      | 8                           | 14                                                                   | .583     |
| Median PFS, month     | 12                          | 12                                                                   | .649     |

Table S2. Multivariate Cox analysis of the International Prognostic Scoring System (IPSS) score and circulating microRNA level as risk factors for overall survival in this study cohort.

| Factors                 | <i>P</i> | HR    | 95.0% CI |        |
|-------------------------|----------|-------|----------|--------|
|                         |          |       | Lower    | Upper  |
| IPSS INT-1 vs. IPSS Low | .245     | 2.093 | .602     | 7.281  |
| IPSS INT-2 vs. IPSS Low | .006     | 4.985 | 1.595    | 15.586 |
| miR-16 high vs. low     | .820     | 1.152 | .341     | 3.890  |
| Let-7a high vs. low     | .006     | 5.178 | 1.615    | 16.601 |

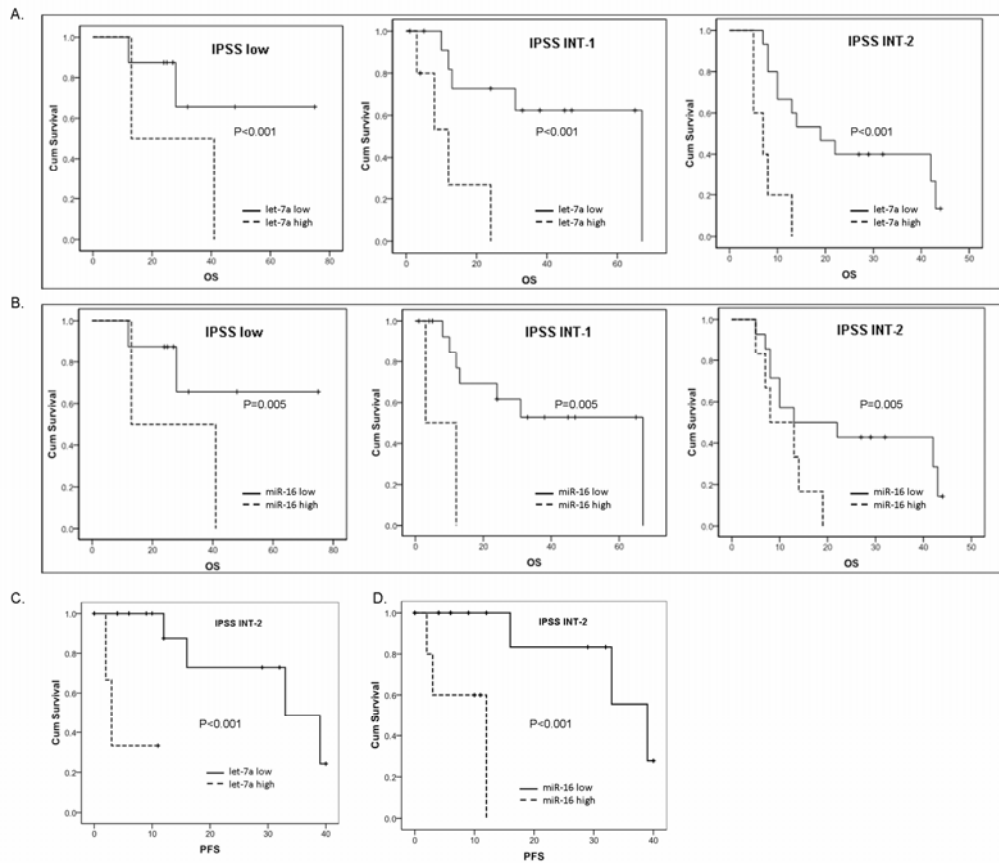

Figure S1. Kaplan-Meier curves showing (A) OS by IPSS risk score then further stratified by let-7a levels ( $P < .001$ ); (B) OS by IPSS risk score then further stratified by miR-16 levels ( $P = .005$ ). PFS in MDS patients with an IPSS risk score of INT-2 further stratified by (C) let-7a ( $P < .001$ ) and (D) miR-16 levels ( $P < .001$ ). OS, overall survival; PFS, progression-free survival; IPSS, International Prognostic Scoring System; INT, intermediate; MDS, myelodysplastic syndrome.

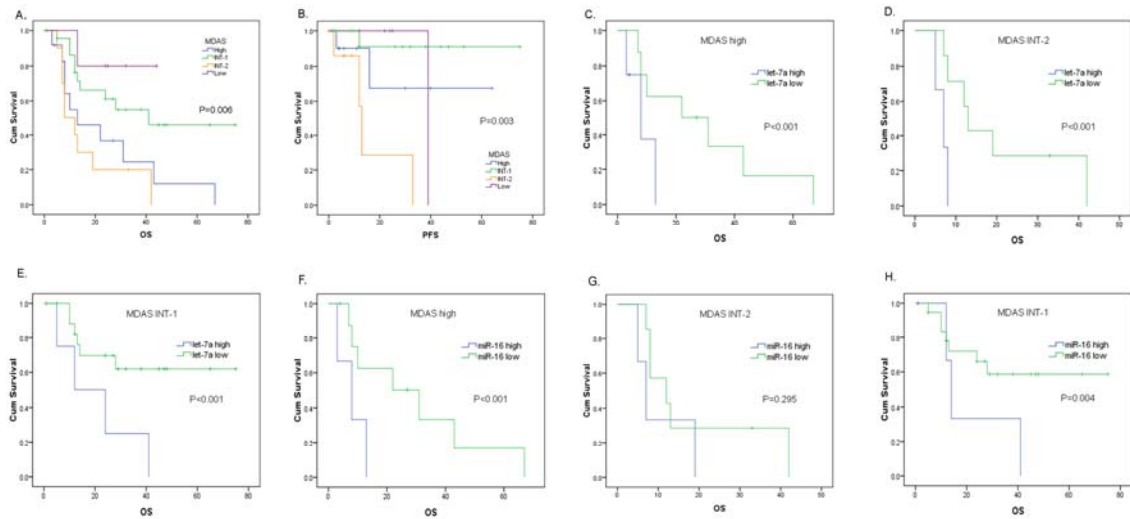

Figure S2. Kaplan-Meier curves showing patient survival based on the MD Anderson risk model score (MDAS) and circulating miR levels. (A) OS of all patients by MDAS risk score ( $P = .006$ ); (B) PFS of all patients by MDAS risk score ( $P = .003$ ). (C) OS of MDAS high patients stratified by let-7a ( $P < .001$ ). (D) OS of MDAS INT-2 patients stratified by let-7a ( $P < .001$ ). (E) OS of MDAS INT-1 patients stratified by let-7a ( $P < .001$ ). (F) OS of MDAS high patients stratified by miR-16 ( $P < .001$ ). (G) OS of MDAS INT-2 patients stratified by miR-16 ( $P = .295$ ). (H) OS of MDAS INT-1 patients stratified by miR-16 ( $P = .004$ ). The number of patients in the MDAS low group was not enough for statistical comparison. OS, overall survival; PFS, progression-free survival; IPSS, International Prognostic Scoring System; INT, intermediate.
